# Supplementary material
Source: PubMed Central journal article supplement (PMC9487362)
Supplement: ERR_0040-2013_Chanez.pdf [file ERR_0040-2013_Chanez.pdf]

## Statement of Interest for ERS publications

1. Send the form electronically to all contributing authors.
2. Each author must complete their own form on screen (the form is clearest when viewed in 'Print Layout' mode).
3. All forms should then be uploaded during the Manuscript Central submission process.

In order for the Editors to make the best decision on how to handle a manuscript it is important that any conflicts of interest that the authors or reviewers of a paper may have are disclosed on submission.

A conflict of interest exists when professional judgement concerning such primary interests as patients' welfare or validity of research may be influenced by possible financial gain or personal rivalry. It may arise for the authors of an article when they have a financial interest that may influence their interpretation of their results or those of others.

When completing the form below, authors should be aware that questions 1-4 relate to the present article, and that questions 5-7 relate to both the present article and to possible conflicts of interest that the author themselves may have, beyond the bounds of this study.

The Editors will not reject papers simply because of a conflict of interest but believe that any competing interests should be acknowledged and openly stated; therefore, a declaration of interest will be printed alongside the final published article.

Name: chanez

Manuscript title: ERR

Manuscript number: Anti-Interleukin-5 therapy in asthma

1. Have you, in the past 5 years, accepted the following from an organisation that may in any way gain or lose financially from the results of your study or the conclusions of your review, editorial or letter? *Please mark the 'yes' or the 'no' box with an 'X'. If you answer yes, please give details in the appropriate section later in this form.*

|                                          | Yes                                 | No                                  |
|------------------------------------------|-------------------------------------|-------------------------------------|
| Reimbursement for attending a symposium. | <input checked="" type="checkbox"/> | <input type="checkbox"/>            |
| A fee for speaking.                      | <input checked="" type="checkbox"/> | <input type="checkbox"/>            |
| A fee for organising education.          | <input checked="" type="checkbox"/> | <input type="checkbox"/>            |
| Funds for research.                      | <input checked="" type="checkbox"/> | <input type="checkbox"/>            |
| Funds for a member of staff.             | <input type="checkbox"/>            | <input checked="" type="checkbox"/> |
| Fees for consulting.                     | <input checked="" type="checkbox"/> | <input type="checkbox"/>            |
| Gifts exceeding €500 per year.           | <input type="checkbox"/>            | <input checked="" type="checkbox"/> |

2. Have you, in the past 5 years, been employed by an organisation that may in any way gain or lose financially from the results of your study or the conclusions of your review, editorial or letter? *Please mark the 'yes' or 'no' box with and 'X'. If you answer yes, please give details in the appropriate section later in this form.*

Yes  No

3. Do you hold any stocks or shares in an organisation that may in any way gain or lose financially from the results of your study or the conclusions of your review, editorial or letter? *Please mark the 'yes' or the 'no' box with an 'X'. If you answer yes, please give details in the appropriate section later in this form.*

Yes  No

4. Have you acted as an expert witness on the subject of your study, review, editorial or letter? *Please mark the 'yes' or the 'no' box with an 'X'. If you answer yes, please give details in the appropriate section later in this form.*

Yes  No

5. Do you have any competing financial interests? *Please mark the 'yes' or the 'no' box with an 'X'. If you answer yes, please give details in the appropriate section later in this form.*

Yes  No

6. Are you or have you ever been in any relationship with or in receipt of any benefit (financial or other) from the tobacco industry or corporate affiliates? *Please mark the 'yes' or the 'no' box with an 'X'. If you answer yes, please give details in the appropriate section later in this form.*

Yes  No

7. Do you or your spouse knowingly hold stocks or shares in companies in the tobacco industry or companies involved in the tobacco industry? *Please mark the 'yes' or the 'no' box with an 'X'. If you answer yes, please give details in the appropriate section later in this form.*

Yes

No

If you have answered "yes" to any of the above questions, the ERS considers that you or your institution may have a conflict of interest, which, in the spirit of openness, should be declared. Please draft and add to this form a statement detailing these interests. This statement will be published alongside your article in the event of acceptance. An example of such a statement is given below:

Conflict of interests: JB has received an educational grant from Acme Pharmaceutical industries; has stocks in excess of £5000 in Grace Bros drugs plc; and travel to the ERS congress was funded by Acme Biotechnologies.

**PLEASE ADD YOUR STATEMENT HERE** (*the box will expand to fit your text*)

*P.C. has provided consultancy services for Almirall, BI, Centocor, GSK, MSD, AZ, Novartis, Teva, Chiesi, and Schering Plough; has served on advisory boards for Almirall, BI, Centocor, GSK, AZ, Novartis, Teva, Chiesi, and Schering Plough, MSD, Sanofi; has received lecture fees from Almirall, BI, Centocor, GSK, AZ, Novartis, Teva, Chiesi, Schering Plough, MSD; and has received industry-sponsored grants from Almirall, BI, Centocor, GSK, AZ, Novartis, Teva, Chiesi, and Schering Plough*

If you did not answer "yes" to any of the questions above, we will publish "Competing interests: None declared."

The above questions are limited to financial interests; however, you might want to disclose another sort of conflict of interest that would embarrass you if it became generally known after publication. The following list gives some examples:

A close relationship with, or a strong antipathy to, a person whose interests may be affected by publication of your paper.

An academic link or rivalry with somebody whose interests may be affected by publication of your paper.

Membership of a political party or special interest group whose interests may be affected by publication of your paper.

A deep personal or religious conviction that may have affected what you wrote and that readers should be aware of when reading your paper.

If you want to declare such a competing interest then please add it to your statement above.
